# Supplementary material for: Soluble Triggering Receptor Expressed on Myeloid Cells and the Diagnosis of Pneumonia
Source: Atypon-hosted journal article supplement (doi:10.1056/nejmoa031544), 2004-01-29
Supplement: nejm_gibot_451sa1-2.pdf [file nejm_gibot_451sa1-2.pdf]

# Supplementary Appendix

This appendix has been provided by the authors to give readers additional information about their work.

Supplement to: Gibot S, Cravoisy A, Levy B, et al. Soluble Triggering Receptor Expressed on Myeloid Cells and the Diagnosis of Pneumonia. *N Engl J Med* 2003;350:451-8.

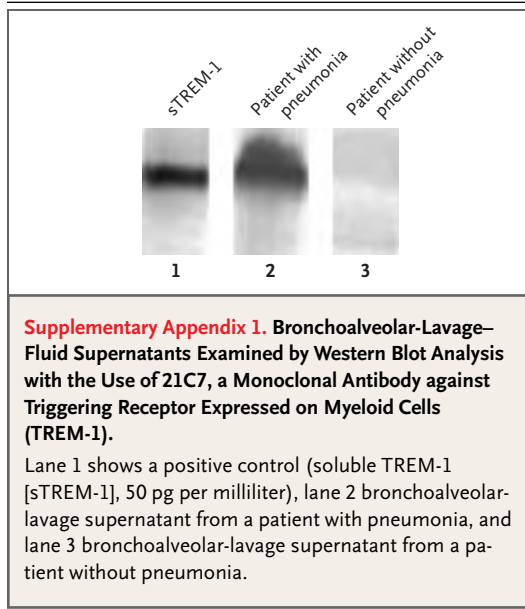

**Supplementary Appendix 2. Features and Organisms Associated with Pneumonia.**

| Feature or Organism             | Community-Acquired Pneumonia (N=38) | Ventilator-Associated Pneumonia (N=46) |
|---------------------------------|-------------------------------------|----------------------------------------|
|                                 | no. (%)                             |                                        |
| Pneumonia                       |                                     |                                        |
| Monomicrobial                   | 36 (95)                             | 37 (80)                                |
| Polymicrobial                   | 2 (5)                               | 9 (20)                                 |
| Total no. of pathogens*         | 40                                  | 58                                     |
| Bacilli                         |                                     |                                        |
| <i>Pseudomonas aeruginosa</i>   | 0                                   | 12 (21)                                |
| <i>Haemophilus influenzae</i>   | 10 (25)                             | 10 (17)                                |
| <i>Acinetobacter baumannii</i>  | 0                                   | 4 (7)                                  |
| <i>Serratia marcescens</i>      | 0                                   | 6 (10)                                 |
| Klebsiella species              | 1 (2)                               | 6 (10)                                 |
| <i>Legionella pneumophila</i>   | 3 (8)                               |                                        |
| Miscellaneous                   | 2 (5)                               | 2 (3)                                  |
| Cocci                           |                                     |                                        |
| <i>Staphylococcus aureus</i>    | 4 (10)                              | 14 (24)                                |
| Streptococcus species           | 1 (2)                               |                                        |
| <i>Streptococcus pneumoniae</i> | 17 (42)                             | 1 (2)                                  |
| Fungi                           | 2 (5)                               | 3 (5)                                  |

\* Organisms shown are those that were isolated at clinically significant concentrations from quantitative cultures of bronchoalveolar-lavage fluid (more than 10<sup>3</sup> colony-forming units per milliliter). *Legionella pneumophila* infection was diagnosed by the detection of the soluble urinary antigen.
